# Supplementary material
Source: PubMed Central journal article supplement (PMC5924882)
Supplement: pnas.201714820SI.pdf [file pnas.201714820SI.pdf]

# Supporting Information

Dahotre et al. 10.1073/pnas.1714820115

## SI Materials and Methods

**DNA Gate Orthogonality and Kinetics.** All DNA strands were purchased from Integrated DNA Technologies with either HPLC purification (TP and CP strands) or standard desalting (RP strands) and were reconstituted to 100  $\mu$ M in 1 $\times$  PBS. Cy5-labeled TP and Iowa Black-labeled CP strands were annealed by heating an equimolar ratio to 95  $^{\circ}$ C and cooling to 20  $^{\circ}$ C over 90 min in a T100 thermal cycler (Bio-Rad). Free TP:CP duplexes or TP:CP duplexes conjugated to antibodies were mixed with RP strands at an equimolar ratio (250 nM final concentration), and fluorescence was monitored using a Cytation 5 plate reader (BioTek).

**Antibodies and pMHC Tetramers for DGS and Staining.** Antibody clones used for kinetic studies were as follows: anti-human CD3 (clone: HIT3a; BD Pharmingen), anti-human CD4 (clone: RPA-T4; BD Pharmingen), and anti-human CD8 (clone: HIT8a; BD Pharmingen). Antibody clones used for cell sorting were as follows: anti-mouse CD8 (clone: 53-6.7; Biolegend), anti-mouse CD4 (clone: RM4-5; Biolegend), and anti-mouse CD19 (clone: 6D5; Biolegend). Antibodies used to check purity were as follows: anti-mouse CD8 (clone: KT15; Bio-Rad), anti-mouse CD4 (clone: RM4-4; Biolegend), and anti-mouse/human B220 (clone: RA3-6B2; Biolegend). PE- or APC-conjugated tetramers were synthesized in house.

**DNA Strand Displacement on Cell Surfaces.** Cell lines were maintained at 37  $^{\circ}$ C, 5% CO<sub>2</sub>. Jurkat and CCRF-CEM cells (ATCC) were grown in RPMI 1640 (Gibco) supplemented with 10% FBS (Gibco) and 100 U/mL penicillin-streptomycin (Gibco). TALL-104 cells (ATCC) were grown in Iscove's modified Dulbecco's medium (IMDM) (Gibco) supplemented with 20% FBS, 100 U/mL penicillin-streptomycin, 2.5  $\mu$ g/mL human albumin (Sigma), 0.5  $\mu$ g/mL D-mannitol (Sigma), and 100 U/mL hIL-2 (Roche). For studies with Ab-DNA gates,  $5 \times 10^5$  cells were stained with quenched Ab-TP:CP complexes (Jurkat plus  $\alpha$ CD3-Gate A; CCRF-CEM plus  $\alpha$ CD4-Gate B; TALL-104 plus  $\alpha$ CD8-Gate C) for 30 min, and baseline Cy5 fluorescence was measured on a BD Accuri C6. RP strands were added to cells at  $\sim 1 \mu$ M final concentration for 30 min before remeasuring Cy5 signal. For studies with tet-DNA gates, biotinylated Db-LMCV GP<sub>33-41</sub> or Db-GP100<sub>25-33</sub> monomer was mixed with quenched StvC-TP:CP complexes at a 4:1 ratio. Then,  $1 \times 10^6$  splenocytes from pmel or P14 mice (The Jackson Laboratory) were stained with 1  $\mu$ g of appropriate quenched tetramer and anti-mouse CD8 (clone: KT15; Bio-Rad) for 30 min, and baseline Cy5 fluorescence was measured on a BD Accuri C6. RP strands were added to cells at 5  $\mu$ M final concentration for 30 min before remeasuring Cy5 signal.

**LCMV Armstrong Infection.** Experiments were performed in accordance with approved Emory University Institutional Animal Care and Use Committee protocols. Six- to 8-wk-old female C57BL/6J mice (The Jackson Laboratory) were infected intraperitoneally with  $2 \times 10^5$  plaque forming units (pfu) of the Armstrong strain of lymphocytic choriomeningitis virus (LCMV).

**Comparing DGS- and MACS-Sorting Efficiency.** CD8<sup>+</sup> T cells were sorted from splenocytes by DGS using the above protocol and by MACS using CD8a (Ly-2) microbeads (Miltenyi Biotec), following the manufacturer's protocol. Cell purity was measured by staining recovered cells with anti-mouse CD8 (clone: KT15; Bio-Rad) and analyzing CD8<sup>+</sup> frequency on a BD Accuri C6. Cell viability after sorting was measured by costaining recovered cells with Annexin V (BD Pharmingen) and 7-AAD (BD Pharmingen) and analyzing on a BD Accuri C6. Viable cells were considered to be Annexin V<sup>-</sup>/7-AAD<sup>-</sup>. Cell yield was measured by counting recovered cells using a hemocytometer.

**Cellular Functional Assays After DGS and MACS Sorting.** EL4 and EG7-OVA cells (ATCC) were grown in RPMI 1640 supplemented with 10% FBS and 25 mM Hepes (Gibco) or with 10% FBS, 10 mM Hepes, 1 mM sodium pyruvate (Gibco), 0.05 mM 2-mercaptoethanol (Sigma), and 0.4 mg/mL G418 (InvivoGen), respectively. CD8<sup>+</sup> T cells were isolated from C57BL/6J (proliferation studies) or OT1 (killing assays; The Jackson Laboratory) splenocytes by DGS using the above protocol and by MACS using CD8a (Ly-2) microbeads (Miltenyi Biotec), following the manufacturer's protocol. Cells were activated by seeding in 96-well plates coated with anti-mouse CD3e (clone: 145-2C11; BD Pharmingen) and anti-mouse CD28 (clone: 37.51; BD Pharmingen) at  $9 \times 10^5$  to  $1.25 \times 10^6$  cells per mL in RPMI 1640 supplemented with 10% FBS, 100 U/mL penicillin-streptomycin, 1 $\times$  nonessential amino acids (Gibco), 1 mM sodium pyruvate, 0.05 mM 2-mercaptoethanol, and 30 U/mL hIL-2 (Roche). After 2 d, cells were transferred to non- $\alpha$ CD3e/ $\alpha$ CD28-coated plates. On day 5, sorted CD8<sup>+</sup> cells from C57BL/6J mice were stained with anti-mouse CD8 (clone: KT15; Bio-Rad), anti-mouse/human CD44 (clone: IM7; Biolegend), and anti-Ki-67 (BD Pharmingen) and then analyzed on a BD FACS Aria Fusion. Sorted CD8<sup>+</sup> cells from OT1 mice were coincubated with EL4 control or EG7-OVA target cells at a 1:1 ratio for 5 h [Brefeldin A (Invitrogen) was added after 4 h] and then stained with anti-mouse CD8 (clone: 53-6.7; BD Pharmingen), anti-mouse/human CD44 (clone: IM7; Biolegend), and anti-mouse Granzyme B (clone: NGZB; eBioscience), and then analyzed on a BD Accuri C6.

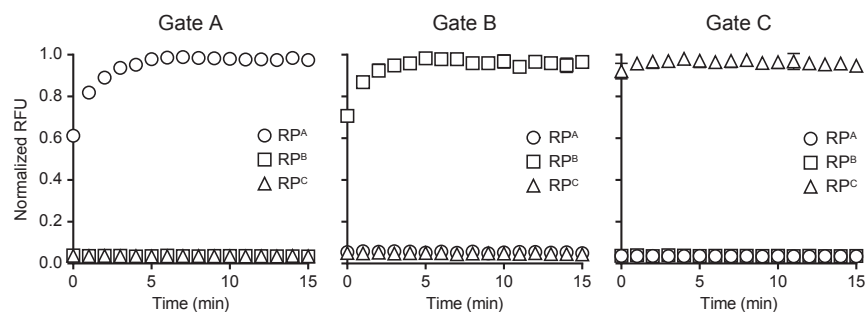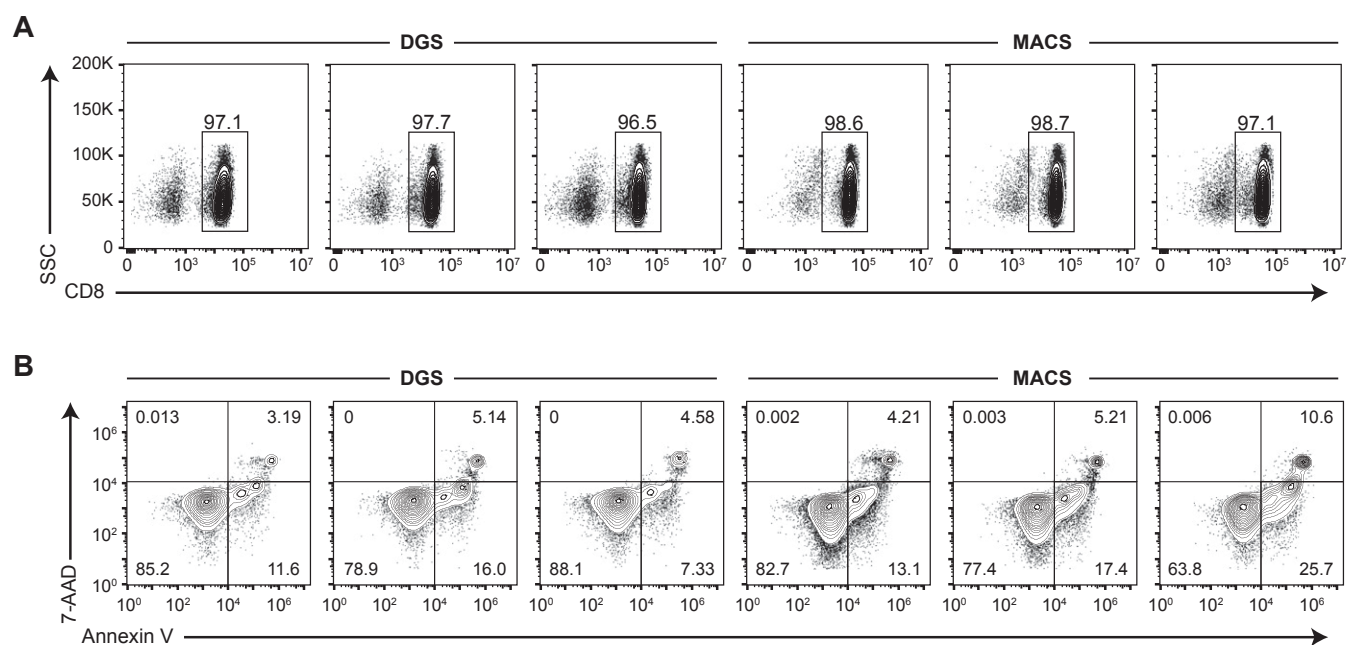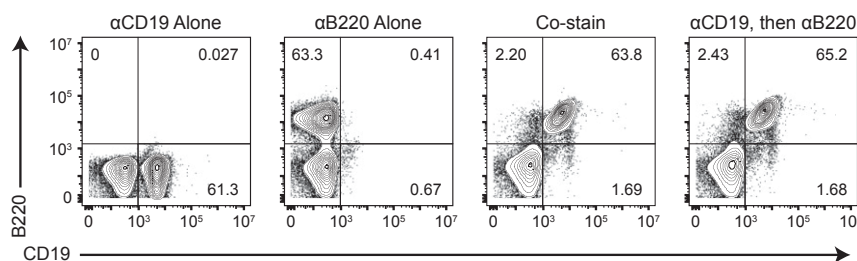





| Gate          | Probe | Sequence                                                |
|---------------|-------|---------------------------------------------------------|
| $\alpha$      | TP    | 5' NH2-GAG TTG GAG AGT TGT GAG GGA GTA TG 3'            |
|               | CP    | 5' BiotinTEG-AAA AAA AAA ACA TAC TCC CTC ACA ACT CTC 3' |
|               | RP    | 5' CAT ACT CCC TCA CAA CTC TCC AAC TC 3'                |
| $\beta$       | TP    | 5' NH2-GTT GAG GTG AGA TGG AAG GAT GTT GG 3'            |
|               | CP    | 5' BiotinTEG-AAA AAA AAA ACC AAC ATC CTT CCA TCT CAC 3' |
|               | RP    | 5' CCA ACA TCC TTC CAT CTC ACC TCA AC 3'                |
| $\gamma$      | TP    | 5' NH2-GTG TAG GGA GGG TTG TAG TAG GAA TG 3'            |
|               | CP    | 5' BiotinTEG-AAA AAA AAA ACA TTC CTA CTA CAA CCC TCC 3' |
|               | RP    | 5' CAT TCC TAC TAC AAC CCT CCC TAC AC 3'                |
| $\delta$      | TP    | 5' NH2-GAT GTG GGT GGT GTA ATG AGT GAG AG 3'            |
|               | CP    | 5' BiotinTEG-AAA AAA AAA ACT CTC ACT CAT TAC ACC ACC 3' |
|               | RP    | 5' CTC TCA CTC ATT ACA CCA CCC ACA TC 3'                |
| $\varepsilon$ | TP    | 5' NH2-GGA TAG GTG GAG AAG GTT GAG GTT AG 3'            |
|               | CP    | 5' BiotinTEG-AAA AAA AAA ACT AAC CTC AAC CTT CTC CAC 3' |
|               | RP    | 5' CTA ACC TCA ACC TTC TCC ACC TAT CC 3'                |
| $\zeta$       | TP    | 5' NH2-GTA AGG GTG TAG GTG AAT AGG TGG AG 3'            |
|               | CP    | 5' BiotinTEG-AAA AAA AAA ACT CCA CCT ATT CAC CTA CAC 3' |
|               | RP    | 5' CTC CAC CTA TTC ACC TAC ACC CTT AC 3'                |
| $\eta$        | TP    | 5' NH2-GTG AAG GAG TGA GTG AGG TTA AGT GG 3'            |
|               | CP    | 5' BiotinTEG-AAA AAA AAA ACC ACT TAA CCT CAC TCA CTC 3' |
|               | RP    | 5' CCA CTT AAC CTC ACT CAC TCC TTC AC 3'                |
| $\theta$      | TP    | 5' NH2-GAG ATG GGA TAA GTA GGT GTG GGT AG 3'            |
|               | CP    | 5' BiotinTEG-AAA AAA AAA ACT ACC CAC ACC TAC TTA TCC 3' |
|               | RP    | 5' CTA CCC ACA CCT ACT TAT CCC ATC TC 3'                |
| $\iota$       | TP    | 5' NH2-GAA GTG GTG GTT AGG AAG TGA GAG TG 3'            |
|               | CP    | 5' BiotinTEG-AAA AAA AAA ACA CTC TCA CTT CCT AAC CAC 3' |
|               | RP    | 5' CAC TCT CAC TTC CTA ACC ACC ACT TC 3'                |
| $\kappa$      | TP    | 5' NH2-GTA GTG GTG AAA TGG TAT GGG TGG AG 3'            |
|               | CP    | 5' BiotinTEG-AAA AAA AAA ACT CCA CCC ATA CCA TTT CAC 3' |
|               | RP    | 5' CTC CAC CCA TAC CAT TTC ACC ACT AC 3'                |
| $\lambda$     | TP    | 5' NH2-GTA TGG GTG TGG TGT AGA ATG GAG AG 3'            |
|               | CP    | 5' BiotinTEG-AAA AAA AAA ACT CTC CAT TCT ACA CCA CAC 3' |
|               | RP    | 5' CTC TCC ATT CTA CAC CAC ACC CAT AC 3'                |
| $\mu$         | TP    | 5' NH2-GGT AAG GTG AGA GGA GTA GGT ATG TG 3'            |
|               | CP    | 5' BiotinTEG-AAA AAA AAA ACA CAT ACC TAC TCC TCT CAC 3' |
|               | RP    | 5' CAC ATA CCT ACT CCT CTC ACC TTA CC 3'                |
| $\nu$         | TP    | 5' NH2-GAG TAG GTG TGG GAA GTA GGT GTA AG 3'            |
|               | CP    | 5' BiotinTEG-AAA AAA AAA ACT TAC ACC TAC TTC CCA CAC 3' |
|               | RP    | 5' CTT ACA CCT ACT TCC CAC ACC TAC TC 3'                |
| $\xi$         | TP    | 5' NH2-GTG ATG GGT AGG GTT GAT TGG GAA AG 3'            |
|               | CP    | 5' BiotinTEG-AAA AAA AAA ACT TTC CCA ATC AAC CCT ACC 3' |
|               | RP    | 5' CTT TCC CAA TCA ACC CTA CCC ATC AC 3'                |
| $\omicron$    | TP    | 5' NH2-GTA GAG GGA GAG TAT TGT AGA GGT GG 3'            |
|               | CP    | 5' BiotinTEG-AAA AAA AAA ACC ACC TCT ACA ATA CTC TCC 3' |
|               | RP    | 5' CCA CCT CTA CAA TAC TCT CCC TCT AC 3'                |
| $\pi$         | TP    | 5' NH2-GAT AGG GTA AGA ATG GGA GTT GGT GG 3'            |
|               | CP    | 5' BiotinTEG-AAA AAA AAA ACC ACC AAC TCC CAT TCT TAC 3' |
|               | RP    | 5' CCA CCA ACT CCC ATT CTT ACC CTA TC 3'                |
| $\rho$        | TP    | 5' NH2-GAT TGG GAT GGT AGG GAG TGT AGA TG 3'            |
|               | CP    | 5' BiotinTEG-AAA AAA AAA ACA TCT ACA CTC CCT ACC ATC 3' |
|               | RP    | 5' CAT CTA CAC TCC CTA CCA TCC CAA TC 3'                |
| $\sigma$      | TP    | 5' NH2-GGT ATG GTG GAG AGT GTG AAA GGT TG 3'            |
|               | CP    | 5' BiotinTEG-AAA AAA AAA ACA ACC TTT CAC ACT CTC CAC 3' |
|               | RP    | 5' CAA CCT TTC ACA CTC TCC ACC ATA CC 3'                |
| $\tau$        | TP    | 5' NH2-GAT GAG GAT GGA TGA GGT GAT TGA GG 3'            |
|               | CP    | 5' BiotinTEG-AAA AAA AAA ACC TCA ACT ACC TCA TCC ATC 3' |
|               | RP    | 5' CCT CAA TCA CCT CAT CCA TCC TCA TC 3'                |
| $\upsilon$    | TP    | 5' NH2-GGA ATG GTT GGG TGA GAG TAG AAG TG 3'            |
|               | CP    | 5' BiotinTEG-AAA AAA AAA ACA CTT CTA CTC TCA CCC AAC 3' |
|               | RP    | 5' CAC TTC TAC TCT CAC CCA ACC ATT CC 3'                |
| $\varphi$     | TP    | 5' NH2-GGT TAG GGT TTA GAT GAG TGG GAA GG 3'            |
|               | CP    | 5' BiotinTEG-AAA AAA AAA ACC TTC CCA CTC ATC TAA ACC 3' |
|               | RP    | 5' CCT TCC CAC TCA TCT AAA CCC TAA CC 3'                |

**Table S2. Cont.**

| Gate     | Probe | Sequence                                                  |
|----------|-------|-----------------------------------------------------------|
| $\chi$   | TP    | 5' NH <sub>2</sub> -GAA TGG GAT AAG TTG GGA GTG GGT AG 3' |
|          | CP    | 5' BiotinTEG-AAA AAA AAA ACT ACC CAC TCC CAA CTT ATC 3'   |
|          | RP    | 5' CTA CCC ACT CCC AAC TTA TCC CAT TC 3'                  |
| $\psi$   | TP    | 5' NH <sub>2</sub> -GGA TTG GGA TAG TGA AAT GGT GTG GG 3' |
|          | CP    | 5' BiotinTEG-AAA AAA AAA ACC CAC ACC ATT TCA CTA TCC 3'   |
|          | RP    | 5' CCC ACA CCA TTT CAC TAT CCC AAT CC 3'                  |
| $\omega$ | TP    | 5' NH <sub>2</sub> -GTT AGG GAT GGA ATG GTT AGG AGG TG 3' |
|          | CP    | 5' BiotinTEG-AAA AAA AAA ACA CCT CCT AAC CAT TCC ATC 3'   |
|          | RP    | 5' CAC CTC CTA ACC ATT CCA TCC CTA AC 3'                  |
